# Supplementary material for: Profiling and Pharmacokinetic Studies of Alkaloids in Rats After Oral Administration of Zanthoxylum nitidum Decoction by UPLC-Q-TOF-MS/MS and HPLC-MS/MS
Source: MDPI journal article supplement (doi:10.3390/molecules24030585), 2019-02-07
Supplement: s1 [file s1]

Table S1 The information of the alkaloids isolated from the *Zanthoxylum nitidum*

| No. | Name                                               | Formula                                         | Selected ion | Exact mass | Type               | Literature     |
|-----|----------------------------------------------------|-------------------------------------------------|--------------|------------|--------------------|----------------|
| 1   | magnoflorine                                       | C <sub>20</sub> H <sub>24</sub> NO <sub>4</sub> | M            | 342.1705   | aporphine          | [4]            |
| 2   | liriodenine                                        | C <sub>17</sub> H <sub>9</sub> NO <sub>3</sub>  | M+H          | 276.0655   | aporphine          | [5-9]          |
| 3   | isotembetarine                                     | C <sub>20</sub> H <sub>26</sub> NO <sub>4</sub> | M            | 344.1862   | benzylisoquinoline | [10]           |
| 4   | α -allocryptopine                                  | C <sub>21</sub> H <sub>23</sub> NO <sub>5</sub> | M+H          | 370.1649   | protopine          | [5,8,11]       |
| 5   | coptisine                                          | C <sub>19</sub> H <sub>14</sub> NO <sub>4</sub> | M            | 320.0923   | protoberberine     | [12]           |
| 6   | protoberberrubine                                  | C <sub>19</sub> H <sub>16</sub> NO <sub>4</sub> | M            | 322.1079   | protoberberine     | [12]           |
| 7   | nitidine                                           | C <sub>21</sub> H <sub>18</sub> NO <sub>4</sub> | M            | 348.1236   | benzophenanthrine  | [5,8,11,13-15] |
| 8   | chelerythrine                                      | C <sub>21</sub> H <sub>18</sub> NO <sub>4</sub> | M            | 348.1236   | benzophenanthrine  | [5,13,14]      |
| 9   | sanguinarine                                       | C <sub>20</sub> H <sub>14</sub> NO <sub>4</sub> | M            | 332.0923   | benzophenanthrine  | [12]           |
| 10  | isofgaridine                                       | C <sub>20</sub> H <sub>16</sub> NO <sub>4</sub> | M            | 334.1079   | benzophenanthrine  | [14]           |
| 11  | decarine                                           | C <sub>19</sub> H <sub>13</sub> NO <sub>4</sub> | M+H          | 320.0917   | benzophenanthrine  | [5,6]          |
| 12  | N-norchelerythrine                                 | C <sub>20</sub> H <sub>16</sub> NO <sub>4</sub> | M+H          | 334.1079   | benzophenanthrine  | [5-8,13]       |
| 13  | rhoifoline B                                       | C <sub>21</sub> H <sub>17</sub> NO <sub>5</sub> | M+H          | 364.1185   | benzophenanthrine  | [16]           |
| 14  | oxynitidine                                        | C <sub>21</sub> H <sub>17</sub> NO <sub>5</sub> | M+H          | 364.1180   | benzophenanthrine  | [5,7,11,13]    |
| 15  | oxychelerythrine                                   | C <sub>21</sub> H <sub>17</sub> NO <sub>5</sub> | M+H          | 364.1180   | benzophenanthrine  | [5,13]         |
| 16  | oxyterihanine                                      | C <sub>20</sub> H <sub>16</sub> NO <sub>5</sub> | M+H          | 350.1028   | benzophenanthrine  | [5]            |
| 17  | oxyavicine                                         | C <sub>20</sub> H <sub>13</sub> NO <sub>5</sub> | M+H          | 348.0866   | benzophenanthrine  | [7,15]         |
| 18  | 6-hydroxymethyldihydronitidine                     | C <sub>22</sub> H <sub>21</sub> NO <sub>5</sub> | M+H          | 380.1498   | benzophenanthrine  | [16]           |
| 19  | bocconoline                                        | C <sub>22</sub> H <sub>21</sub> NO <sub>5</sub> | M+H          | 380.1498   | benzophenanthrine  | [5,16]         |
| 20  | O-demethyl- bocconoline                            | C <sub>21</sub> H <sub>19</sub> NO <sub>5</sub> | M+H          | 366.1336   | benzophenanthrine  | [17]           |
| 21  | dihydronitidine                                    | C <sub>21</sub> H <sub>19</sub> NO <sub>4</sub> | M+H          | 350.1387   | benzophenanthrine  | [3,8,11]       |
| 22  | dihydrochelerythrine                               | C <sub>21</sub> H <sub>19</sub> NO <sub>4</sub> | M+H          | 350.1387   | benzophenanthrine  | [5-8,15]       |
| 23  | 6-methoxynitidine                                  | C <sub>22</sub> H <sub>21</sub> NO <sub>5</sub> | M+H          | 380.1492   | benzophenanthrine  | [18]           |
| 24  | 6-methoxychelerythrine                             | C <sub>22</sub> H <sub>21</sub> NO <sub>5</sub> | M+H          | 380.1492   | benzophenanthrine  | [3,5,15]       |
| 25  | 6-ethoxychelerythrine                              | C <sub>23</sub> H <sub>23</sub> NO <sub>5</sub> | M+H          | 394.1654   | benzophenanthrine  | [5,13]         |
|     | (R)-6-[(R)-1-hydroxyethyl]dihydrochelerythrine (1) | C <sub>23</sub> H <sub>23</sub> NO <sub>5</sub> | M+H          | 394.1654   | benzophenanthrine  | [15]           |
| 27  | 6-methoxynorchelerythrine                          | C <sub>21</sub> H <sub>17</sub> NO <sub>5</sub> | M+H          | 364.1185   | benzophenanthrine  | [15]           |
| 28  | 6-hydroxydihydrochelerythrine                      | C <sub>21</sub> H <sub>19</sub> NO <sub>5</sub> | M+H          | 366.1341   | benzophenanthrine  | [15]           |
| 29  | 6-acetyldihydronitidine                            | C <sub>24</sub> H <sub>23</sub> NO <sub>5</sub> | M+H          | 406.1654   | benzophenanthrine  | [8]            |

|    |                                  |                                                 |     |          |                   |                         |
|----|----------------------------------|-------------------------------------------------|-----|----------|-------------------|-------------------------|
| 30 | 6-acetyldihydrochelerythrine     | C <sub>24</sub> H <sub>23</sub> NO <sub>5</sub> | M+H | 406.1654 | benzophenanthrine | [8]                     |
| 31 | 6-acetyldihydroavicine           | C <sub>23</sub> H <sub>19</sub> NO <sub>5</sub> | M+H | 390.1341 | benzophenanthrine | [8]                     |
| 32 | 6-methoxyisodecarine             | C <sub>20</sub> H <sub>15</sub> NO <sub>5</sub> | M+H | 350.1028 | benzophenanthrine | [19]                    |
| 33 | 6-methoxysanguinarine            | C <sub>21</sub> H <sub>17</sub> NO <sub>5</sub> | M+H | 364.1185 | benzophenanthrine | [19]                    |
| 34 | zanthomurolanine                 | C <sub>37</sub> H <sub>45</sub> NO <sub>5</sub> | M+H | 584.3370 | benzophenanthrine | [20]                    |
| 35 | epi-zanthomurolanine             | C <sub>37</sub> H <sub>45</sub> NO <sub>5</sub> | M+H | 584.3370 | benzophenanthrine | [20]                    |
| 36 | zanthocadinanines A              | C <sub>37</sub> H <sub>45</sub> NO <sub>5</sub> | M+H | 584.3370 | benzophenanthrine | [20]                    |
| 37 | zanthocadinanines B              | C <sub>37</sub> H <sub>45</sub> NO <sub>5</sub> | M+H | 584.3370 | benzophenanthrine | [20]                    |
| 38 | epi-zanthocadinanine B           | C <sub>37</sub> H <sub>45</sub> NO <sub>5</sub> | M+H | 584.3370 | benzophenanthrine | [20]                    |
| 39 | isoarnottianamide                | C <sub>21</sub> H <sub>19</sub> NO <sub>6</sub> | M+H | 382.1285 | benzophenanthrine | [5]                     |
| 40 | arnottianamide                   | C <sub>21</sub> H <sub>19</sub> NO <sub>6</sub> | M+H | 382.1285 | benzophenanthrine | [5,6,8]                 |
| 41 | integriamide                     | C <sub>20</sub> H <sub>15</sub> NO <sub>6</sub> | M+H | 366.0972 | benzophenanthrine | [5]                     |
| 42 | skimmianine                      | C <sub>14</sub> H <sub>13</sub> NO <sub>4</sub> | M+H | 260.0917 | quinoline         | [5,7-<br>9,11,13,16,18] |
| 43 | haplopine                        | C <sub>13</sub> H <sub>11</sub> NO <sub>4</sub> | M+H | 246.0761 | quinoline         | [7]                     |
| 44 | dictamnine                       | C <sub>12</sub> H <sub>9</sub> NO <sub>2</sub>  | M+H | 200.0706 | quinoline         | [9,16,18]               |
| 45 | γ-fagarine                       | C <sub>13</sub> H <sub>11</sub> NO <sub>3</sub> | M+H | 230.0812 | quinoline         | [16,18]                 |
| 46 | 5-methoxydictamnine              | C <sub>13</sub> H <sub>11</sub> NO <sub>3</sub> | M+H | 230.0812 | quinoline         | [18]                    |
| 47 | robustine                        | C <sub>12</sub> H <sub>9</sub> NO <sub>3</sub>  | M+H | 216.0661 | quinoline         | [16]                    |
| 48 | zanthobungeanine                 | C <sub>16</sub> H <sub>17</sub> NO <sub>3</sub> | M+H | 272.1287 | quinoline         | [9]                     |
| 49 | zanthodioline                    | C <sub>16</sub> H <sub>19</sub> NO <sub>5</sub> | M+H | 306.1136 | quinoline         | [9]                     |
| 50 | edulinine                        | C <sub>16</sub> H <sub>21</sub> NO <sub>4</sub> | M+H | 292.1549 | quinoline         | [8]                     |
| 51 | N-methylflindersine              | C <sub>15</sub> H <sub>15</sub> NO <sub>2</sub> | M+H | 242.1181 | quinoline         | [9]                     |
| 52 | 4-methoxy-(-)-methyl-2-quinolone | C <sub>11</sub> H <sub>11</sub> NO <sub>2</sub> | M+H | 190.0868 | quinoline         | [16]                    |
